# Supplementary material for: Genetic Diversity, Structure and Effective Population Size of Old-Growth vs. Second-Growth Populations of Keystone and Long-Lived Conifer, Eastern White Pine (Pinus strobus): Conservation Value and Climate Adaptation Potential
Source: Frontiers journal article supplement (doi:10.3389/fgene.2021.650299), 2021-08-12
Supplement: Image_1.pdf [file Image_1.pdf]

**A**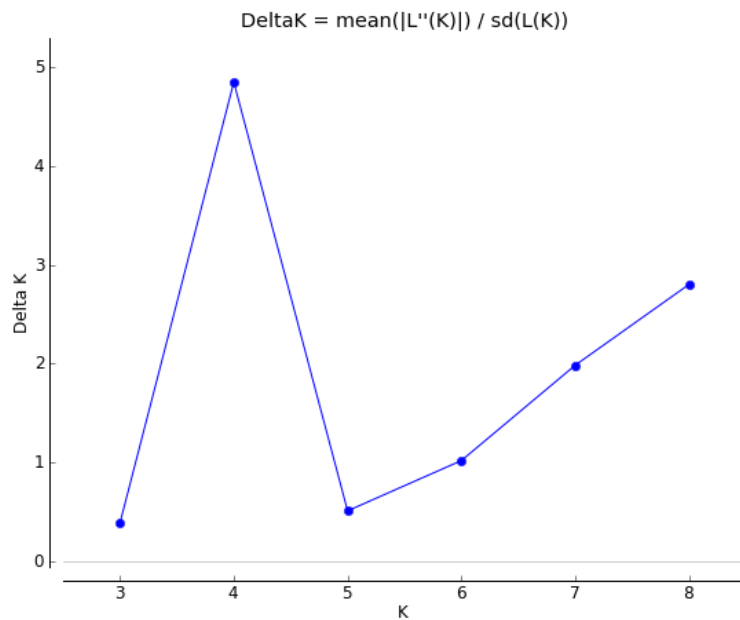**B**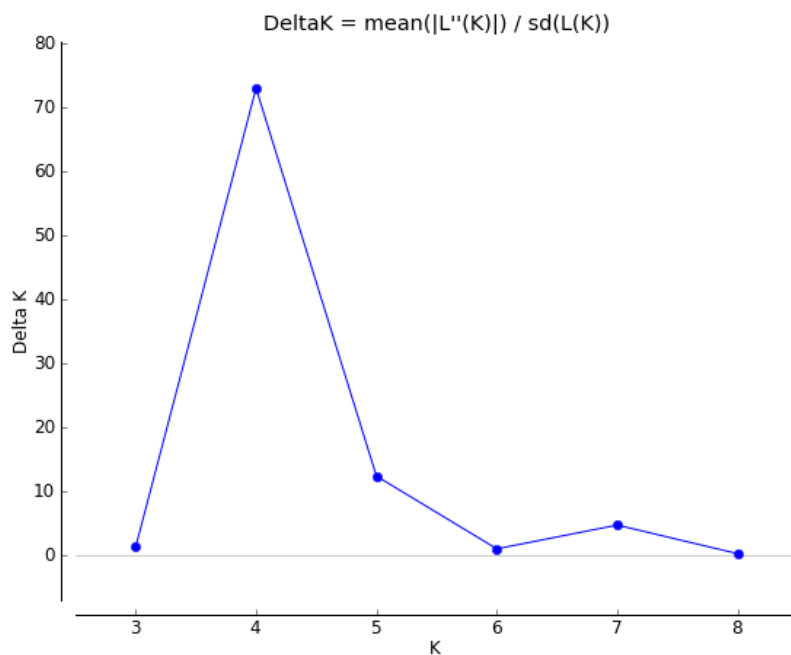

**Figure S1.** Summary scatterplot of Delta  $K$  values for eastern white pine populations testing ( $K=$ ) 2 – 9 clusters, calculated from the STRUCTURE results using the Evanno *et al.* (2005) method in Structure Harvester. **(A)** nuclear microsatellites; and **(B)** nuclear SNPs.
