# Supplementary material for: Genetic Diversity, Structure and Effective Population Size of Old-Growth vs. Second-Growth Populations of Keystone and Long-Lived Conifer, Eastern White Pine (Pinus strobus): Conservation Value and Climate Adaptation Potential
Source: Frontiers journal article supplement (doi:10.3389/fgene.2021.650299), 2021-08-12
Supplement: Table_3.pdf [file Table_3.pdf]

**Table S3.** Genetic diversity parameters, fixation index and their (SE), and effective population size and their (95% CIs) for four eastern white pine second-growth populations from Quebec based on 12 nuclear microsatellite markers.

| Population     | Population abbreviation | A               | A <sub>E</sub> | H <sub>O</sub>   | H <sub>E</sub>   | <i>F</i>         | N <sub>E</sub> (LD) |
|----------------|-------------------------|-----------------|----------------|------------------|------------------|------------------|---------------------|
| Temiscouata    | QCTM                    | 10.25<br>(0.64) | 4.81<br>(0.42) | 0.695<br>(0.056) | 0.774<br>(.020)  | 0.093<br>(0.081) | 70 (55-95)          |
| Cap Tourmente  | QCCT                    | 9.33<br>(0.79)  | 4.36<br>(0.43) | 0.620<br>(0.061) | 0.741<br>(0.029) | 0.147<br>(0.089) | 76 (55-115)         |
| Saint Renyold  | QCSR                    | 10.25<br>(1.33) | 4.17<br>(0.69) | 0.563<br>(0.066) | 0.697<br>(0.041) | 0.209<br>(0.070) | 147 (88-367)        |
| Saint Stanilis | QCSS                    | 9.83<br>(1.56)  | 4.88<br>(0.98) | 0.652<br>(0.070) | 0.692<br>(0.052) | 0.068<br>(0.063) | 142 (89-308)        |
|                | Overall mean            | 9.92<br>(0.56)  | 4.56<br>(0.33) | 0.632<br>(0.031) | 0.726<br>(0.019) | 0.129<br>(0.038) | 109 (20.7)          |

A, number of alleles per locus; A<sub>E</sub>, effective number of alleles per locus; H<sub>O</sub>, observed heterozygosity; H<sub>E</sub>, expected heterozygosity; *F*, fixation index; N<sub>E</sub> (LD), contemporary effective population size based on linkage disequilibrium using allele frequency critical value of 0.03.
